# Supplementary material for: Integrated analysis of miRNA and mRNA expression profiles in development of porcine testes
Source: Royal Society of Chemistry journal article supplement (doi:10.1039/c5ra07488f), 2015-01-01
Supplement: c5ra07488f2.pdf [file c5ra07488f2.pdf]

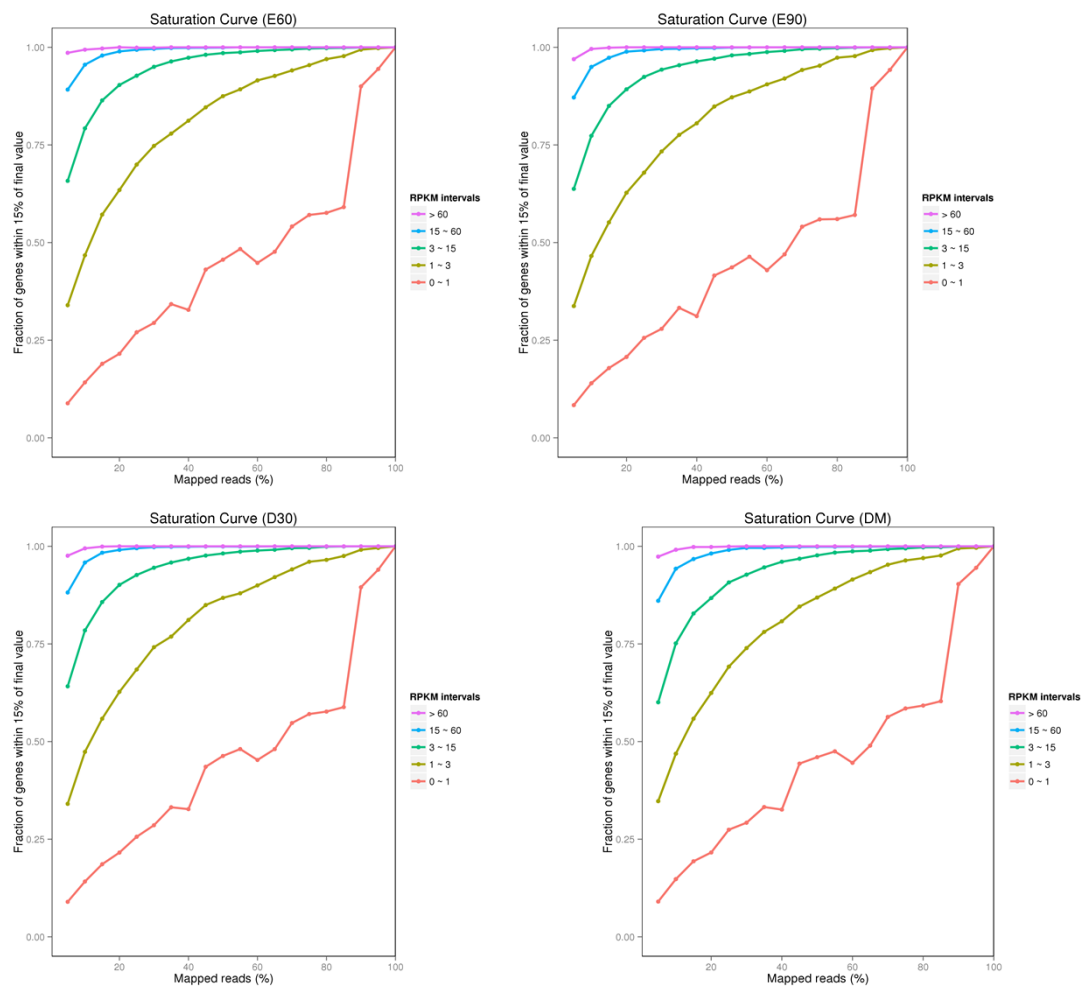

Figure S2 saturation cure analysis of the gene expression read libraries generated from four samples.
