# Supplementary material for: Integrated analysis of miRNA and mRNA expression profiles in development of porcine testes
Source: Royal Society of Chemistry journal article supplement (doi:10.1039/c5ra07488f), 2015-01-01
Supplement: c5ra07488f3.xlsx [file c5ra07488f3.xlsx]

## Sheet: Table S2
Table S2 Summary of the known procine miRNAs identified in four libraries
miRNA	Sequence	length(nt)	E60.readcount	E90.readcount	D30.readcount	DM.readcount	E60.tpm	E90.tpm	D30.tpm	DM.tpm
ssc-let-7a	UGAGGUAGUAGGUUGUAUAGUU	22	48918	59689	74234	7057	16782.9	17134.9	27490.1	18565.2
ssc-let-7c	UGAGGUAGUAGGUUGUAUGGUU	22	10892	38485	16591	917	3736.85	11047.9	6143.92	2412.4
ssc-let-7d-3p	CUAUACGACCUGCUGCCUUUCU	22	133	217	206	26	45.6299	62.2941	76.2852	68.3995
ssc-let-7d-5p	AGAGGUAGUAGGUUGCAUAGUU	22	1384	2830	2120	213	474.825	812.407	785.071	560.349
ssc-let-7e	UGAGGUAGGAGGUUGUAUAGUU	22	18703	14285	10516	574	6416.66	4100.79	3894.25	1510.05
ssc-let-7f	UGAGGUAGUAGAUUGUAUAGUU	22	190367	203606	210542	40426	65311.5	58449.1	77967.1	106351
ssc-let-7g	UGAGGUAGUAGUUUGUACAGUU	22	99085	83232	139652	9659	33994.3	23893.4	51715.4	25410.4
ssc-let-7i	UGAGGUAGUAGUUUGUGCU	19	74924	211054	108790	7675	25705.1	60587.2	40286.7	20191
ssc-miR-1	UGGAAUGUAAAGAAGUAUGUA	21	2614	150689	4311	3073	896.816	43258.2	1596.43	8084.29
ssc-miR-100	AACCCGUAGAUCCGAACUUGUG	22	38951	95781	25256	11258	13363.4	27495.8	9352.71	29617
ssc-miR-101	UACAGUACUGUGAUAACUGAA	21	29969	11394	34205	8170	10281.8	3270.87	12666.7	21493.2
ssc-miR-103	AGCAGCAUUGUACAGGGCUAUGA	23	23473	15962	22626	1881	8053.16	4582.2	8378.78	4948.44
ssc-miR-105-1	UCAAAUGCUCAGACUCCUGU	20	29	27	17	0	9.94937	7.75088	6.29538	0
ssc-miR-105-2	UCAAAUGCUCAGACUCCUUG	20	4	6	3	0	1.37233	1.72242	1.11095	0
ssc-miR-106a	AAAAGUGCUUACAGUGCAGGUAGC	24	167	118	103	4	57.2947	33.8742	38.1426	10.523
ssc-miR-107	AGCAGCAUUGUACAGGGCUAUCA	23	1654	1140	2284	115	567.457	327.259	845.803	302.536
ssc-miR-10a-3p	CAAAUUCGUAUCUAGGGGAAU	21	51	332	18	0	17.4972	95.3071	6.66569	0
ssc-miR-10a-5p	UACCCUGUAGAUCCGAAUUUGU	22	53880	145611	6724	875	18485.3	41800.5	2490.01	2301.9
ssc-miR-10b	UACCCUGUAGAACCGAAUUUGU	22	751242	420099	310119	57241	257738	120598	114842	150587
ssc-miR-122	UGGAGUGUGACAAUGGUGUUUGU	23	233	152	11	26	79.9381	43.6346	4.07348	68.3995
ssc-miR-124a	UAAGGCACGCGGUGAAUGCCA	21	3	1	1	1	1.02925	0.287069	0.370316	2.63075
ssc-miR-125a	UCCCUGAGACCCUUUAACCUGUG	23	12237	16512	11050	327	4198.29	4740.09	4092	860.255
ssc-miR-125b	UCCCUGAGACCCUAACUUGUGA	22	13442	31735	12913	488	4611.71	9110.15	4781.89	1283.81
ssc-miR-126-3p	UCGUACCGUGAGUAAUAAUGCG	22	30894	37917	42320	8533	10599.2	10884.8	15671.8	22448.2
ssc-miR-126-5p	CAUUAUUACUUUUGGUACGCG	21	563	961	813	301	193.155	275.874	301.067	791.855
ssc-miR-127	UCGGAUCCGUCUGAGCUUGGCU	22	2489	12988	1241	15	853.931	3728.46	459.563	39.4612
ssc-miR-1271	UGCCUGCUAUGUGCCAGGCA	20	4	1	2	0	1.37233	0.287069	0.740633	0
ssc-miR-1277	UACGUAGAUAUAUAUGUAUUUU	22	4	6	5	1	1.37233	1.72242	1.85158	2.63075
ssc-miR-128	UCACAGUGAACCGGUCUCUUU	21	3378	4177	3004	517	1158.93	1199.09	1112.43	1360.1
ssc-miR-1285	CUGGGCAACAUAGCGAGACCCCGU	24	143	83	389	20	49.0607	23.8268	144.053	52.615
ssc-miR-1296-5p	UUAGGGCCCUGGCUCCAUCUCC	22	25	25	17	5	8.57705	7.17674	6.29538	13.1537
ssc-miR-129a-3p	AAGCCCUUACCCCAAAAAGCAU	22	88	35	20	11	30.1912	10.0474	7.40633	28.9382
ssc-miR-129a-5p	CUUUUUGCGGUCUGGGCUUGC	21	264	156	85	57	90.5736	44.7828	31.4769	149.953
ssc-miR-1306-3p	ACGUUGGCUCUGGUGGUGAUG	21	47	25	31	7	16.1248	7.17674	11.4798	18.4152
ssc-miR-1306-5p	CCACCUCCCCUGCAAACGUCCA	22	130	144	163	14	44.6006	41.338	60.3616	36.8305
ssc-miR-1307	ACUCGGCGUGGCGUCGGUCGUG	22	1267	878	1402	158	434.685	252.047	519.183	415.658
ssc-miR-130a	CAGUGCAAUGUUAAAAGGGCAU	22	378	300	264	12	129.685	86.1208	97.7635	31.569
ssc-miR-130b	CAGUGCAAUGAUGAAAGGGCAU	22	30	38	24	2	10.2925	10.9086	8.88759	5.2615
ssc-miR-132	UAACAGUCUACAGCCAUGGUCG	22	39	50	46	11	13.3802	14.3535	17.0346	28.9382
ssc-miR-133a-3p	UUGGUCCCCUUCAACCAGCUG	21	20	3182	114	20	6.86164	913.455	42.2161	52.615
ssc-miR-133a-5p	AGCUGGUAAAAUGGAACCAAAU	22	4	206	7	1	1.37233	59.1363	2.59221	2.63075
ssc-miR-133b	UUUGGUCCCCUUCAACCAGCUAU	23	4	439	5	5	1.37233	126.024	1.85158	13.1537
ssc-miR-1343	CUCCUGGGGCCCGCACUCUCGC	22	183	175	185	25	62.784	50.2372	68.5085	65.7687
ssc-miR-135	UAUGGCUUUUUAUUCCUAUGUGA	23	430	114	72	28	147.525	32.7259	26.6628	73.6609
ssc-miR-136	ACUCCAUUUGUUUUGAUGAUGGA	23	94	518	46	2	32.2497	148.702	17.0346	5.2615
ssc-miR-137	UUAUUGCUUAAGAAUACGCGUAG	23	58	12	51	3	19.8987	3.44483	18.8861	7.89224
ssc-miR-138	AGCUGGUGUUGUGAAUCAGGC	21	23	7	3	1	7.89088	2.00949	1.11095	2.63075
ssc-miR-139-3p	UGGAGACGCGGCCCUGUUGGAGU	23	40	58	69	21	13.7233	16.65	25.5518	55.2457
ssc-miR-139-5p	UCUACAGUGCACGUGUCUCCAG	22	976	1259	990	329	334.848	361.421	366.613	865.516
ssc-miR-140-3p	UACCACAGGGUAGAACCACGGAC	23	61141	16868	32404	4189	20976.4	4842.29	11999.7	11020.2
ssc-miR-140-5p	AGUGGUUUUACCCUAUGGUAG	21	1703	739	1152	108	584.268	212.144	426.604	284.121
ssc-miR-142-3p	UGUAGUGUUUCCUACUUUAUGG	22	68	76	176	9	23.3296	21.8173	65.1757	23.6767
ssc-miR-142-5p	CAUAAAGUAGAAAGCACUACU	21	144	237	957	42	49.4038	68.0355	354.393	110.491
ssc-miR-143-3p	UGAGAUGAAGCACUGUAGCUC	21	114856	131543	88025	44658	39405	37762	32597.1	117484
ssc-miR-143-5p	GGUGCAGUGCUGCAUCUCUGG	21	221	588	269	32	75.8211	168.797	99.6151	84.1839
ssc-miR-144	UACAGUAUAGAUGAUGUAC	19	554	920	1196	85	190.067	264.104	442.898	223.614
ssc-miR-145-3p	GGAUUCCUGGAAAUACUGUUCU	22	519	1314	889	109	178.06	377.209	329.211	286.752
ssc-miR-145-5p	GUCCAGUUUUCCCAGGAAUCCCUU	24	5773	15673	9406	847	1980.61	4499.24	3483.2	2228.24
ssc-miR-1468	CUCCGUUUGCCUGUUUUGCUGA	22	232	349	329	99	79.595	100.187	121.834	260.444
ssc-miR-146a-5p	UGAGAACUGAAUUCCAUGGGUU	22	172	70	879	111	59.0101	20.0949	325.508	292.013
ssc-miR-146b	UGAGAACUGAAUUCCAUAGGC	21	3835	2203	965	227	1315.72	632.414	357.355	597.18
ssc-miR-148a-3p	UCAGUGCACUACAGAACUUUGU	22	271252	429812	297792	38146	93061.6	123386	110277	100353
ssc-miR-148a-5p	AAAGUUCUGAGACACUCCGACU	22	1320	2557	1312	258	452.868	734.037	485.855	678.733
ssc-miR-148b-3p	UCAGUGCAUCACAGAACUUUGU	22	7457	9482	8827	514	2558.36	2721.99	3268.78	1352.2
ssc-miR-148b-5p	GAAGUUCUGUUAUACACUCAGGC	23	125	97	97	16	42.8852	27.8457	35.9207	42.092
ssc-miR-149	UCUGGCUCCGUGUCUUCACUCCC	23	1048	365	635	11	359.55	104.78	235.151	28.9382
ssc-miR-150	UCUCCCAACCCUUGUACCAGUG	22	63	105	158	40	21.6142	30.1423	58.51	105.23
ssc-miR-151-3p	CUAGACUGAAGCUCCUUGAGGA	22	5085	5065	7058	1612	1744.57	1454.01	2613.69	4240.77
ssc-miR-151-5p	UCGAGGAGCUCACAGUCUAGU	21	544	678	590	76	186.637	194.633	218.487	199.937
ssc-miR-152	UCAGUGCAUGACAGAACUUGG	21	18123	16510	11331	543	6217.67	4739.52	4196.05	1428.5
ssc-miR-153	UUGCAUAGUCACAAAAGUGA	20	2	0	2	0	0.686164	0	0.740633	0
ssc-miR-155-3p	UCCUACAUGUUAGCAUUAACA	21	0	0	1	0	0	0	0.370316	0
ssc-miR-155-5p	UUAAUGCUAAUUGUGAUAGGGG	22	182	5274	700	13	62.4409	1514	259.221	34.1997
ssc-miR-15a	UAGCAGCACAUAAUGGUUUGU	21	56	86	89	13	19.2126	24.688	32.9582	34.1997
ssc-miR-15b	UAGCAGCACAUCAUGGUUUACA	22	321	448	441	42	110.129	128.607	163.31	110.491
ssc-miR-16	UAGCAGCACGUAAAUAUUGGCG	22	1521	1809	1495	259	521.828	519.309	553.623	681.364
ssc-miR-17-3p	ACUGCAGUGAAGGCACUUGUAG	22	50	15	29	4	17.1541	4.30604	10.7392	10.523
ssc-miR-17-5p	CAAAGUGCUUACAGUGCAGGUAG	23	2822	1167	2317	93	968.177	335.01	858.023	244.66
ssc-miR-181a	AACAUUCAACGCUGUCGGUGAGUU	24	18159	23427	14130	692	6230.02	6725.18	5232.57	1820.48
ssc-miR-181b	AACAUUCAUUGCUGUCGGUGGGUU	24	2990	2889	2768	55	1025.81	829.344	1025.04	144.691
ssc-miR-181c	AACAUUCAACCUGUCGGUGAGU	22	195	115	175	21	66.901	33.013	64.8054	55.2457
ssc-miR-181d-3p	CCCACCGAGGGAUGAAUGUCAC	22	0	0	1	0	0	0	0.370316	0
ssc-miR-181d-5p	AACAUUCAUUGUUGUCGGUGGGUU	24	596	507	609	21	204.477	145.544	225.523	55.2457
ssc-miR-182	UUUGGCAAUGGUAGAACUCACACU	24	1926	344	1535	784	660.776	98.7519	568.436	2062.51
ssc-miR-183	UAUGGCACUGGUAGAAUUCACUG	23	544	78	143	321	186.637	22.3914	52.9552	844.47
ssc-miR-1839-3p	AGACCUACUUUUCUACCAACA	21	0	0	1	0	0	0	0.370316	0
ssc-miR-1839-5p	AAGGUAGAUAGAACAGGUCUUG	22	133	57	160	99	45.6299	16.363	59.2506	260.444
ssc-miR-184	UGGACGGAGAACUGAUAAGGGU	22	95	25	29	7	32.5928	7.17674	10.7392	18.4152
ssc-miR-185	UGGAGAGAAAGGCAGUUCCUGA	22	1558	1824	2562	272	534.522	523.615	948.75	715.564
ssc-miR-186	CAAAGAAUUCUCCUUUUGGGCUU	23	1105	1467	3335	184	379.105	421.131	1235	484.058
ssc-miR-187	UCGUGUCUUGUGUUGCAGCCGG	22	8	7	3	0	2.74466	2.00949	1.11095	0
ssc-miR-18a	UAAGGUGCAUCUAGUGCAGAUA	22	178	76	121	13	61.0686	21.8173	44.8083	34.1997
ssc-miR-18b	UAAGGUGCAUCUAGUGCAGUUAG	23	2	2	3	0	0.686164	0.574139	1.11095	0
ssc-miR-190a	UGAUAUGUUUGAUAUAUUAGG	21	13	25	36	6	4.46006	7.17674	13.3314	15.7845
ssc-miR-190b	UGAUAUGUUUGAUAUUGGGUUG	22	2	2	1	4	0.686164	0.574139	0.370316	10.523
ssc-miR-191	CAACGGAAUCCCAAAAGCAGCUG	23	8775	7086	15087	1068	3010.54	2034.17	5586.96	2809.64
ssc-miR-192	CUGACCUAUGAAUUGACAGCC	21	201	255	82	36	68.9595	73.2027	30.3659	94.7069
ssc-miR-193a-3p	AACUGGCCUACAAAGUCCCAGU	22	2	11	9	5	0.686164	3.15776	3.33285	13.1537
ssc-miR-193a-5p	UGGGUCUUUGCGGGCGAGAUGA	22	134	373	209	21	45.973	107.077	77.3961	55.2457
ssc-miR-194a	UGUAACAGCAACUCCAUGUGG	21	36	31	21	2	12.3509	8.89915	7.77664	5.2615
ssc-miR-194b-5p	UGUAACAGCGACUCCAUGUGGA	22	1	42	1	0	0.343082	12.0569	0.370316	0
ssc-miR-195	UAGCAGCACAGAAAUAUUGGC	21	54	236	641	90	18.5264	67.7484	237.373	236.767
ssc-miR-196a	UAGGUAGUUUCAUGUUGUUGGG	22	148	1089	55	0	50.7761	312.619	20.3674	0
ssc-miR-196b-3p	CGACAGCACGACACUGCCUUCA	22	0	1	0	0	0	0.287069	0	0
ssc-miR-196b-5p	UAGGUAGUUUCCUGUUGUUGGG	22	66	1411	66	0	22.6434	405.055	24.4409	0
ssc-miR-199a-3p	ACAGUAGUCUGCACAUUGGUUA	22	39265	94320	41630	836	13471.1	27076.4	15416.3	2199.31
ssc-miR-199a-5p	CCCAGUGUUCAGACUACCUGUUC	23	33102	69350	30002	1107	11356.7	19908.3	11110.2	2912.24
ssc-miR-199b-3p	UACAGUAGUCUGCACAUUGGUU	22	39262	94312	41629	836	13470.1	27074.1	15415.9	2199.31
ssc-miR-199b-5p	CCCAGUGUUUAGACUAUCUGUU	22	28992	60344	27667	384	9946.63	17322.9	10245.5	1010.21
ssc-miR-19a	UGUGCAAAUCUAUGCAAAACUGA	23	241	119	164	8	82.6827	34.1613	60.7319	21.046
ssc-miR-19b	UGUGCAAAUCCAUGCAAAACUGA	23	2501	1185	1420	169	858.048	340.177	525.849	444.596
ssc-miR-202-3p	AGAGGUGUAGGCAUGGGAA	19	870	203	1206	112	298.481	58.2751	446.601	294.644
ssc-miR-202-5p	UUCCUAUGCAUAUACUUCUUU	21	51317	8078	97697	8886	17605.9	2318.95	36178.8	23376.8
ssc-miR-204	UUCCCUUUGUCAUCCUAUGCCU	22	423	1125	345	129	145.124	322.953	127.759	339.367
ssc-miR-205	UCCUUCAUUCCACCGGAGUCUG	22	6	187	8	6	2.05849	53.682	2.96253	15.7845
ssc-miR-206	UGGAAUGUAAGGAAGUGUGUGA	22	657	10949	140	20	225.405	3143.12	51.8443	52.615
ssc-miR-208b	AUAAGACGAACAAAAGGUUUGU	22	0	4	0	0	0	1.14828	0	0
ssc-miR-20a	UAAAGUGCUUAUAGUGCAGGUA	22	12279	4414	7823	424	4212.7	1267.12	2896.98	1115.44
ssc-miR-20b	CAAAGUGCUCACAGUGCAGGUAG	23	129	86	80	2	44.2576	24.688	29.6253	5.2615
ssc-miR-21	UAGCUUAUCAGACUGAUGUUGA	22	115352	186332	239029	36181	39575.2	53490.2	88516.3	95183.1
ssc-miR-210	CUGUGCGUGUGACAGCGGCUGA	22	73	310	37	6	25.045	88.9915	13.7017	15.7845
ssc-miR-212	ACCUUGGCUCUAGACUGCUUACU	23	15	19	26	2	5.14623	5.45432	9.62822	5.2615
ssc-miR-214	ACAGCAGGCACAGACAGGCAG	21	4954	13820	3033	150	1699.63	3967.3	1123.17	394.612
ssc-miR-215	AUGACCUAUGAAUUGACAGAC	21	17	240	31	2	5.83239	68.8967	11.4798	5.2615
ssc-miR-216	UAAUCUCAGCUGGCAACUGUGAG	23	7	3	15	3	2.40157	0.861208	5.55474	7.89224
ssc-miR-217	UACUGCAUCAGGAACUGAUUGGAU	24	35	54	181	28	12.0079	15.5018	67.0273	73.6609
ssc-miR-218-5p	UUGUGCUUGAUCUAACCAUGU	21	7435	9586	2790	280	2550.81	2751.85	1033.18	736.609
ssc-miR-219a	AGAGUUGAGUCUGGACGUCCCG	22	7	6	4	2	2.40157	1.72242	1.48127	5.2615
ssc-miR-219b-3p	AGAAUUGUGGCUGGACAUCU	20	3	1	2	0	1.02925	0.287069	0.740633	0
ssc-miR-221-3p	AGCUACAUUGUCUGCUGGGUUU	22	931	1557	3779	86	319.409	446.967	1399.43	226.244
ssc-miR-221-5p	ACCUGGCAUACAAUGUAGAUUUCUGU	26	335	443	968	38	114.932	127.172	358.466	99.9684
ssc-miR-222	AGCUACAUCUGGCUACUGGGUCUC	24	841	675	2307	136	288.532	193.772	854.32	357.782
ssc-miR-22-3p	AAGCUGCCAGUUGAAGAACUGU	22	0	0	3	1	0	0	1.11095	2.63075
ssc-miR-224	CAAGUCACUAGUGGUUCCGUUUA	23	164	54	117	6	56.2654	15.5018	43.327	15.7845
ssc-miR-2320-3p	CGAUGAUGGUCCCUGUGUUUG	21	13	13	21	2	4.46006	3.7319	7.77664	5.2615
ssc-miR-2320-5p	UGGCACAGGGUCCAGCUGUCGG	22	39	32	46	3	13.3802	9.18622	17.0346	7.89224
ssc-miR-2366	UGGGUCACAGAAGAGGGUCUGG	22	2	1	3	0	0.686164	0.287069	1.11095	0
ssc-miR-23a	AUCACAUUGCCAGGGAUUUCC	21	1362	3010	2079	258	467.278	864.079	769.888	678.733
ssc-miR-23b	AUCACAUUGCCAGGGAUUACCA	22	1170	2258	1575	175	401.406	648.203	583.248	460.381
ssc-miR-2411	UGGAGUGACUGUCAGAUGCAGC	22	21	0	21	4	7.20472	0	7.77664	10.523
ssc-miR-24-1-5p	GUGCCUACUGAGCUGAAACACAGU	24	95	162	99	51	32.5928	46.5053	36.6613	134.168
ssc-miR-24-2-5p	GUGCCUACUGAGCUGAUAUCAGU	23	37	33	53	4	12.694	9.47329	19.6268	10.523
ssc-miR-24-3p	UGGCUCAGUUCAGCAGGAACAG	22	7326	8931	7128	1266	2513.42	2563.82	2639.61	3330.53
ssc-miR-2483	AAACAUCUGGUUGGUUGAGAGA	22	38	28	20	0	13.0371	8.03795	7.40633	0
ssc-miR-26a	UUCAAGUAAUCCAGGAUAGGCU	22	96612	131860	88109	6807	33145.8	37853	32628.2	17907.5
ssc-miR-27a	UUCACAGUGGCUAAGUUCCGC	21	1331	1109	3352	221	456.642	318.36	1241.3	581.395
ssc-miR-27b-3p	UUCACAGUGGCUAAGUUCUGC	21	33481	37347	52239	3593	11486.7	10721.2	19345	9452.28
ssc-miR-27b-5p	AGAGCUUAGCUGAUUGGUGAACA	23	31	38	72	6	10.6355	10.9086	26.6628	15.7845
ssc-miR-28-3p	CACUAGAUUGUGAGCUCCUGGA	22	1753	2005	2771	219	601.423	575.574	1026.15	576.134
ssc-miR-28-5p	AAGGAGCUCACAGUCUAUUGAG	22	310	280	413	81	106.355	80.3795	152.941	213.091
ssc-miR-296-3p	AGGGUUGGGCGGAGGCUUUCC	21	390	373	139	34	133.802	107.077	51.474	89.4454
ssc-miR-29a	CUAGCACCAUCUGAAAUCGGUUA	23	397	150	1506	449	136.204	43.0604	557.696	1181.21
ssc-miR-29b	UAGCACCAUUUGAAAUCAGUGUU	23	31	4	86	36	10.6355	1.14828	31.8472	94.7069
ssc-miR-29c	UAGCACCAUUUGAAAUCGGUUA	22	15	5	44	30	5.14623	1.43535	16.2939	78.9224
ssc-miR-30a-3p	CUUUCAGUCGGAUGUUUGCAGC	22	226	273	253	33	77.5365	78.37	93.69	86.8147
ssc-miR-30a-5p	UGUAAACAUCCUCGACUGGAAG	22	22801	19117	20871	3676	7822.61	5487.91	7728.87	9670.63
ssc-miR-30b-3p	CUGGGAGGUGGAUGUUUACUU	21	8	20	27	1	2.74466	5.74139	9.99854	2.63075
ssc-miR-30b-5p	UGUAAACAUCCUACACUCAGCU	22	1452	1928	2609	317	498.155	553.47	966.155	833.947
ssc-miR-30c-1-3p	CUGGGAGAGGGUUGUUUACU	20	31	33	31	2	10.6355	9.47329	11.4798	5.2615
ssc-miR-30c-3p	CUGGGAGAAGGCUGUUUACUCU	22	129	174	79	15	44.2576	49.9501	29.255	39.4612
ssc-miR-30c-5p	UGUAAACAUCCUACACUCUCAGC	23	7086	6005	6082	436	2431.08	1723.85	2252.26	1147.01
ssc-miR-30d	UGUAAACAUCCCCGACUGGAAGCU	24	23307	25184	29356	2868	7996.21	7229.56	10871	7544.99
ssc-miR-30e-3p	CUUUCAGUCGGAUGUUUACAGC	22	824	816	1115	189	282.699	234.249	412.903	497.211
ssc-miR-30e-5p	UGUAAACAUCCUUGACUGGAAGCU	24	12637	9399	16900	1776	4335.53	2698.17	6258.35	4672.21
ssc-miR-31	AGGCAAGAUGCUGGCAUAGCUG	22	56	26	17	26	19.2126	7.46381	6.29538	68.3995
ssc-miR-32	UAUUGCACAUUACUAAGUUGC	21	703	229	699	89	241.187	65.7389	258.851	234.137
ssc-miR-320	AAAAGCUGGGUUGAGAGGGCGAA	23	2732	5229	2395	109	937.3	1501.09	886.908	286.752
ssc-miR-324	CGCAUCCCCUAGGGCAUUGGUGU	23	34	50	24	4	11.6648	14.3535	8.88759	10.523
ssc-miR-325	CCUAGUAGGUGUUCAGUAAGUGU	23	2	1	0	0	0.686164	0.287069	0	0
ssc-miR-326	CCUCUGGGCCCUUCCUCCAG	20	16	14	5	0	5.48931	4.01897	1.85158	0
ssc-miR-328	CUGGCCCUCUCUGCCCUUCCGU	22	256	298	245	19	87.829	85.5467	90.7275	49.9842
ssc-miR-331-3p	GCCCCUGGGCCUAUCCUAGAA	21	80	59	91	9	27.4466	16.9371	33.6988	23.6767
ssc-miR-331-5p	UCUAGGUAUGGUCCCAGGGAU	21	13	33	29	2	4.46006	9.47329	10.7392	5.2615
ssc-miR-335	UCAAGAGCAAUAACGAAAAAUG	22	280	716	103	8	96.0629	205.542	38.1426	21.046
ssc-miR-338	UCCAGCAUCAGUGAUUUUGUUG	22	1	7	1	1	0.343082	2.00949	0.370316	2.63075
ssc-miR-339-3p	AGCUCCUCGAGGCCAGAGCCC	21	6	6	5	0	2.05849	1.72242	1.85158	0
ssc-miR-339-5p	UCCCUGUCCUCCAGGAGCUCAC	22	1119	1538	1308	49	383.909	441.513	484.374	128.907
ssc-miR-340	UUAUAAAGCAAUGAGACUGAUU	22	7983	5057	6049	753	2738.82	1451.71	2240.04	1980.95
ssc-miR-345-3p	CCCUGAACUAGGGGUCUGGAG	21	10	13	16	3	3.43082	3.7319	5.92506	7.89224
ssc-miR-345-5p	GCUGACUCCUAGUCCAGUGC	20	9	14	12	2	3.08774	4.01897	4.4438	5.2615
ssc-miR-34a	UGGCAGUGUCUUAGCUGGUUGU	22	0	1	3	0	0	0.287069	1.11095	0
ssc-miR-34c	AGGCAGUGUAGUUAGCUGAUUGC	23	300	33	73	9471	102.925	9.47329	27.0331	24915.8
ssc-miR-361-3p	CCCCCAGGUGUGAUUCUGAUUUGC	24	1211	707	3084	164	415.472	202.958	1142.06	431.443
ssc-miR-361-5p	UUAUCAGAAUCUCCAGGGGUAC	22	353	365	250	23	121.108	104.78	92.5791	60.5072
ssc-miR-362	AAUCCUUGGAACCUAGGUGUGAGUG	25	553	386	466	54	189.724	110.809	172.567	142.06
ssc-miR-363	AAUUGCACGGUAUCCAUCUGUAA	23	670	1158	589	15	229.865	332.426	218.116	39.4612
ssc-miR-365-3p	UAAUGCCCCUAAAAAUCCUUAU	22	389	629	978	63	133.459	180.567	362.169	165.737
ssc-miR-365-5p	GAGGGACUUUCAGGGGCAGCUGU	23	9	12	13	1	3.08774	3.44483	4.81411	2.63075
ssc-miR-369	AAUAAUACAUGGUUGAUCUUU	21	170	1054	65	0	58.3239	302.571	24.0706	0
ssc-miR-370	GCCUGCUGGGGUGGAACCUGGU	22	20	123	6	0	6.86164	35.3095	2.2219	0
ssc-miR-371-5p	ACUCAAACUGUGGGGGCACUUU	22	29	0	3	0	9.94937	0	1.11095	0
ssc-miR-374a-3p	CUUAUCAGGUUGUAUUGUAAUU	22	551	689	787	58	189.038	197.791	291.439	152.583
ssc-miR-374a-5p	UUAUAAUACAACCUGAUAAGUG	22	372	412	493	17	127.626	118.273	182.566	44.7227
ssc-miR-374b-3p	CUUAUCAGGUUGUAUUAUCAUU	22	30	18	36	1	10.2925	5.16725	13.3314	2.63075
ssc-miR-374b-5p	AUAUAAUACAACCUGCUAAGUG	22	522	961	904	35	179.089	275.874	334.766	92.0762
ssc-miR-376a-3p	AUCAUAGAGGAAAAUCCACGU	21	1	18	0	0	0.343082	5.16725	0	0
ssc-miR-376a-5p	GUAGAUUCUCCUUCUAUGAGUAC	23	5	15	1	1	1.71541	4.30604	0.370316	2.63075
ssc-miR-376c	GUGGAUAUUCCUUCUAUGUUUA	22	8	12	0	0	2.74466	3.44483	0	0
ssc-miR-378	ACUGGACUUGGAGUCAGAAGGC	22	1027	3778	911	135	352.345	1084.55	337.358	355.151
ssc-miR-378b-3p	ACUGGACUUGGAGUCAGAAGU	21	123	293	134	17	42.1991	84.1114	49.6224	44.7227
ssc-miR-381	AGCGAGGUUGCCCUUUGUAUAUU	23	1	11	0	0	0.343082	3.15776	0	0
ssc-miR-382	AAGUUGUUCGUGGUGGAUUCG	21	90	341	32	1	30.8774	97.8907	11.8501	2.63075
ssc-miR-421-3p	AUCAACAGACAUUAAUUGGGCGC	23	21	25	15	6	7.20472	7.17674	5.55474	15.7845
ssc-miR-423-3p	AGCUCGGUCUGAGGCCCCUCAGU	23	8545	7192	7394	743	2931.63	2064.6	2738.12	1954.65
ssc-miR-423-5p	UGAGGGGCAGAGAGCGAGACUUU	23	7066	6073	6683	590	2424.22	1743.37	2474.82	1552.14
ssc-miR-424-5p	CAGCAGCAAUUCAUGUUUUGAA	22	1477	377	1586	49	506.732	108.225	587.322	128.907
ssc-miR-425-3p	AUCGGGAAUGUCGUGUCCGCCC	22	74	118	117	8	25.3881	33.8742	43.327	21.046
ssc-miR-425-5p	AAUGACACGAUCACUCCCGUUGA	23	460	669	1532	299	157.818	192.049	567.325	786.594
ssc-miR-429	UAAUACUGUCUGGUAAUGCCGU	22	43	124	33	3	14.7525	35.5966	12.2204	7.89224
ssc-miR-432-3p	UGGAUGGCUCCUCCAUGGCU	20	1	1	0	0	0.343082	0.287069	0	0
ssc-miR-432-5p	UCUUGGAGUAGGUCAUUGGGU	21	35	214	14	0	12.0079	61.4329	5.18443	0
ssc-miR-4331	UGUGGCUGUGGUGUAGGCCAGC	22	0	1	2	8	0	0.287069	0.740633	21.046
ssc-miR-4332	CACGGCCGCCGCCGGGCGCC	20	4	2	5	1	1.37233	0.574139	1.85158	2.63075
ssc-miR-4334-3p	UCCCUGUCCUCCAGGAGCUC	20	267	267	385	16	91.6029	76.6476	142.572	42.092
ssc-miR-4338	AUGUUCAGUCUCAGUGGGAACC	22	0	1	0	0	0	0.287069	0	0
ssc-miR-450a	UUUUGCGAUGUGUUCCUAAUAU	22	20346	5267	16941	518	6980.34	1512	6273.53	1362.73
ssc-miR-450b-3p	UUGGGAACAUUUUGCAUCCAU	21	12	7	36	0	4.11698	2.00949	13.3314	0
ssc-miR-450b-5p	UUUUGCAAUAUGUUCCUGAAUA	22	19655	6309	19138	700	6743.27	1811.12	7087.11	1841.52
ssc-miR-450c-3p	AUUGGGAACAUUUUGCAUUCGU	22	85	37	103	1	29.162	10.6216	38.1426	2.63075
ssc-miR-450c-5p	UUUUGCGAUGUGUUCCUAAUAC	22	34848	9200	20111	909	11955.7	2641.04	7447.43	2391.35
ssc-miR-451	AAACCGUUACCAUUACUGAGUU	22	4368	22324	11767	2662	1498.58	6408.54	4357.51	7003.05
ssc-miR-452	AACUGUUUGCAGAGGAAACUGA	22	888	245	527	31	304.657	70.332	195.157	81.5532
ssc-miR-455-3p	GCAGUCCAUGGGCAUAUACAC	21	942	813	594	13	323.183	233.388	219.968	34.1997
ssc-miR-455-5p	UAUGUGCCUUUGGACUACAUCG	22	8930	6779	4104	341	3063.72	1946.04	1519.78	897.085
ssc-miR-486	UCCUGUACUGAGCUGCCCCGAG	22	47	320	216	11	16.1248	91.8622	79.9883	28.9382
ssc-miR-487b	GUGGUUAUCCCUGUCCUGUUCG	22	0	1	0	0	0	0.287069	0	0
ssc-miR-489	AGUGACAUCACAUAUACGGCGG	22	3	3	0	3	1.02925	0.861208	0	7.89224
ssc-miR-490-3p	CAACCUGGAGGACUCCAUGCUG	22	166	289	126	44	56.9516	82.9631	46.6599	115.753
ssc-miR-490-5p	CCAUGGAUCCCCAGGUGGGU	20	0	2	0	0	0	0.574139	0	0
ssc-miR-491	AGUGGGGAACCCUUCCAUGAGG	22	4	7	5	0	1.37233	2.00949	1.85158	0
ssc-miR-493-3p	UGAAGGUCUACUGUGUGCCAGG	22	51	167	8	0	17.4972	47.9406	2.96253	0
ssc-miR-493-5p	UUGUACAUGGUAGGCUUUCAUU	22	106	449	42	1	36.3667	128.894	15.5533	2.63075
ssc-miR-497	CAGCAGCACACUGUGGUUUGU	21	6	21	61	14	2.05849	6.02846	22.5893	36.8305
ssc-miR-499-3p	AACAUCACAGCAAGUCUGUGCU	22	0	1	1	0	0	0.287069	0.370316	0
ssc-miR-499-5p	UUAAGACUUGCAGUGAUGUUU	21	1130	794	1361	333	387.683	227.933	504.001	876.039
ssc-miR-500	AUGCACCUGGGCAAGGAUUCU	21	1073	642	897	74	368.127	184.299	332.174	194.675
ssc-miR-504	AGACCCUGGUCUGCACUCUAUCU	23	276	506	223	14	94.6906	145.257	82.5805	36.8305
ssc-miR-505	UCAACACUUGCUGGUUUCCUCU	22	149	169	150	8	51.1192	48.5147	55.5474	21.046
ssc-miR-532-3p	CCUCCCACACCCAAGGCUUGCA	22	243	151	190	9	83.3689	43.3475	70.3601	23.6767
ssc-miR-532-5p	CAUGCCUUGAGUGUAGGACCGU	22	23219	12580	14038	3421	7966.02	3611.33	5198.5	8999.79
ssc-miR-542-3p	UGUGACAGAUUGAUAACUGAAA	22	59330	8317	22416	486	20355	2387.56	8301.01	1278.54
ssc-miR-542-5p	UCGGGGAUCAUCAUGUCACGA	21	139	44	82	2	47.6884	12.6311	30.3659	5.2615
ssc-miR-545-3p	AUCAACAAACAUUUAUUGUGUG	22	10	5	15	0	3.43082	1.43535	5.55474	0
ssc-miR-545-5p	UCAGUAAAUGUUUAUUGGAUG	21	0	0	1	0	0	0	0.370316	0
ssc-miR-551a	GCGACCCACUCUUGGUUUCC	20	13	16	6	0	4.46006	4.59311	2.2219	0
ssc-miR-574	CACGCUCAUGCACACACCCACA	22	643	1408	468	39	220.602	404.194	173.308	102.599
ssc-miR-582	UAACCGGUUGAACAACUGAACC	22	42	40	13	5	14.4094	11.4828	4.81411	13.1537
ssc-miR-615	UCCGAGCCUGGGUCUCCCUCU	21	216	84	52	0	74.1057	24.1138	19.2564	0
ssc-miR-628	AUGCUGACAUAUUUACUAGAGG	22	23	18	22	4	7.89088	5.16725	8.14696	10.523
ssc-miR-652	ACAACCCUAGGAGAGGGUGCCAUUCA	26	12	5	22	0	4.11698	1.43535	8.14696	0
ssc-miR-664-3p	UAUUCAUUUAUCUCCCAGCCUACA	24	129	87	230	10	44.2576	24.975	85.1728	26.3075
ssc-miR-664-5p	CAGGCUAGGAGAAGUGAUUGGAU	23	164	88	181	27	56.2654	25.2621	67.0273	71.0302
ssc-miR-671-3p	UCCGGUUCUCAGGGCUCCACC	21	32	38	22	4	10.9786	10.9086	8.14696	10.523
ssc-miR-671-5p	AGGAAGCCCUGGAGGGGCUGGAGG	24	15	40	25	1	5.14623	11.4828	9.25791	2.63075
ssc-miR-676-3p	CCGUCCUAAGGUUGUUGAGUU	21	1551	606	749	10	532.12	173.964	277.367	26.3075
ssc-miR-676-5p	CUCUUCAAUCUCAGGACUCGCA	22	4	4	1	0	1.37233	1.14828	0.370316	0
ssc-miR-6782-3p	UGACCUCUGGUCUCCCGCCCUG	22	7	7	20	0	2.40157	2.00949	7.40633	0
ssc-miR-7	UGGAAGACUAGUGAUUUUGUUGUU	24	4572	5778	8197	1861	1568.57	1658.69	3035.48	4895.82
ssc-miR-708-3p	CAACUAGACUGUGAGCUUCUAGA	23	2665	675	1700	310	914.313	193.772	629.538	815.532
ssc-miR-708-5p	AAGGAGCUUACAAUCUAGCUGGG	23	1122	371	995	63	384.938	106.503	368.465	165.737
ssc-miR-7134-3p	AUGCGGAACCUGCGGAUACGG	21	1842	1210	1777	265	631.957	347.354	658.052	697.148
ssc-miR-7134-5p	AUGUCCGCGGGUUCCCUAUCC	21	270	216	141	30	92.6321	62.007	52.2146	78.9224
ssc-miR-7135-3p	AUCUGUCUGUGUCUCUGAGCAG	22	20	3	18	2	6.86164	0.861208	6.66569	5.2615
ssc-miR-7136-3p	UCUCAGUGUUUGAACCAGAAGC	22	2	0	1	0	0.686164	0	0.370316	0
ssc-miR-7136-5p	UCUGGUCCAGACACUGUGGAGC	22	26	7	32	37	8.92013	2.00949	11.8501	97.3377
ssc-miR-7137-3p	AGCUGGUCUGGGAGUUCCCGGG	22	8	3	8	2	2.74466	0.861208	2.96253	5.2615
ssc-miR-7137-5p	CGGGGGAACUCCCAGACCAGC	21	17	3	23	1	5.83239	0.861208	8.51728	2.63075
ssc-miR-7138-3p	GAGGACUGGCCUUGCAGGGUGC	22	2	1	0	0	0.686164	0.287069	0	0
ssc-miR-7138-5p	UCCCAGCAAGUGUCCAUCCAUCU	23	25	30	16	0	8.57705	8.61208	5.92506	0
ssc-miR-7139-3p	UAGGGCACAGGAUGGGAUGAGG	22	4	2	1	0	1.37233	0.574139	0.370316	0
ssc-miR-7139-5p	CCAUUCCUUCGUCUGUGCACUAG	23	23	32	28	1	7.89088	9.18622	10.3689	2.63075
ssc-miR-7140-3p	AUGAUGCCCCUUAGAGUUGAGC	22	2	5	2	1	0.686164	1.43535	0.740633	2.63075
ssc-miR-7142-3p	UUUGUUGGCUCCUCUGAAGUGA	22	21	24	41	6	7.20472	6.88967	15.183	15.7845
ssc-miR-7142-5p	ACUCUCCGAGGGGCCUUCAAGGG	23	1	0	0	0	0.343082	0	0	0
ssc-miR-7143-3p	UCUGCACUUGAAGCUGAGACUGA	23	1	3	0	0	0.343082	0.861208	0	0
ssc-miR-7143-5p	AAGCUCAGCUCUGAAGUGCAGAGG	24	0	1	0	0	0	0.287069	0	0
ssc-miR-7144-5p	ACUUUCCCGGGAUUUGGAGCGC	22	7	9	13	1	2.40157	2.58363	4.81411	2.63075
ssc-miR-744	UGCGGGGCUAGGGCUAACAGCA	22	779	856	577	123	267.261	245.731	213.673	323.582
ssc-miR-758	UUUGUGACCUGGUCCACUAAC	21	0	2	0	0	0	0.574139	0	0
ssc-miR-769-3p	CUGGGAUCUCUGGGGUCUUGGUU	23	64	151	52	5	21.9572	43.3475	19.2564	13.1537
ssc-miR-769-5p	UGAGACCUCUGGGUUCUGAGC	21	1022	842	735	230	350.63	241.713	272.183	605.072
ssc-miR-7857-3p	AUUGUUCUCCAACCUGGCUCUU	22	0	3	27	6	0	0.861208	9.99854	15.7845
ssc-miR-874	CUGCCCUGGCCCGAGGGACCGAC	23	274	188	128	33	94.0044	53.9691	47.4005	86.8147
ssc-miR-885-3p	AGGCAGCGGGGUGUAGUGGAU	21	0	1	1	0	0	0.287069	0.370316	0
ssc-miR-885-5p	UCCAUUACACUACCCUGCCUCU	22	5	2	3	0	1.71541	0.574139	1.11095	0
ssc-miR-9	UCUUUGGUUAUCUAGCUGUAUG	22	851	572	274	632	291.963	164.204	101.467	1662.63
ssc-miR-9-1	UCUUUGGUUAUCUAGCUGUAUGA	23	851	572	274	632	291.963	164.204	101.467	1662.63
ssc-miR-92a	UAUUGCACUUGUCCCGGCCUGU	22	23884	18004	26430	1014	8194.17	5168.4	9787.46	2667.58
ssc-miR-92b-3p	UAUUGCACUCGUCCCGGCCUCC	22	78	179	48	13	26.7604	51.3854	17.7752	34.1997
ssc-miR-92b-5p	AGGGACGGGACGCGGUGCAGUGUU	24	5	8	1	0	1.71541	2.29656	0.370316	0
ssc-miR-935	CCAGUUACCGCUUCCGCUACCGC	23	1	0	1	0	0.343082	0	0.370316	0
ssc-miR-95	UUCAACGGGUAUUUAUUGAGCA	22	61	128	162	56	20.928	36.7449	59.9912	147.322
ssc-miR-96-5p	UUUGGCACUAGCACAUUUUUGCU	23	200	21	72	107	68.6164	6.02846	26.6628	281.49
ssc-miR-9788-3p	AGAGGAGAGGCUACCACCACCA	22	1	2	0	0	0.343082	0.574139	0	0
ssc-miR-98	UGAGGUAGUAAGUUGUAUUGUU	22	1702	1754	2440	161	583.925	503.52	903.572	423.55
ssc-miR-9820-5p	GAGGAGGAGGGAAGAAAGGCU	21	0	0	3	1	0	0	1.11095	2.63075
ssc-miR-9840-3p	UCUAGAGGAGAUCGUGGGGGA	21	0	0	1	0	0	0	0.370316	0
ssc-miR-9841-3p	UCUAGCAUCGAGCACCCGCCU	21	4	3	3	0	1.37233	0.861208	1.11095	0
ssc-miR-9843-3p	UCUGUGAACUAGAAACCUCUGG	22	6	21	23	2	2.05849	6.02846	8.51728	5.2615
ssc-miR-9851-3p	UGGCACCAGCACUGGCGGUGGC	22	2	1	2	1	0.686164	0.287069	0.740633	2.63075
ssc-miR-9858-5p	UUCCUGAGUCGGACUGGGCU	20	3	3	6	0	1.02925	0.861208	2.2219	0
ssc-miR-9860-5p	UUGCCCGAGAGCUUGGACCGC	21	3	2	3	0	1.02925	0.574139	1.11095	0
ssc-miR-99a	AACCCGUAGAUCCGAUCUUGUG	22	136345	265134	187623	19053	46777.5	76111.9	69479.9	50123.6
ssc-miR-99b	CACCCGUAGAACCGACCUUGCG	22	11856	7768	8423	967	4067.58	2229.96	3119.17	2543.93
