# Supplementary material for: Integrated analysis of miRNA and mRNA expression profiles in development of porcine testes
Source: Royal Society of Chemistry journal article supplement (doi:10.1039/c5ra07488f), 2015-01-01
Supplement: c5ra07488f4.xlsx [file c5ra07488f4.xlsx]

## Sheet: Sheet1
Table S3 Identified novle miRNA in four libraries
novel miRNA	Precursor_miRNA						Mature_miRNA				Reads
	location	sequence	struct	length	GC%	MFE	miRNA	count	miRNA*	count	E60.readcount	E90.readcount	D30.readcount	DM.readcount	E60.tpm	E90.tpm	D30.tpm	DM.tpm
novel_143	X:137139994..137140104:-	CGCCACAUGGAGCCAUUCAGCGUGCAGUGCUUUUCACAAGAAGGUGUCAAUUCAGGUGGACUAAAAUAUGAAUGGCGCUUUUUUGUGAAGAGUAAUGGACACCAUGUAAGG	....((((((.((......))((.((.((((((((((((((((((((((.((((.((........)).)))))))))))))))))))))))))).)).)).))))))....	111	45.05	-42.8	aauggcgcuuuuuugugaaga	276	uucacaagaaggugucaauu	28	30	5	187	54	10.2925	1.43535	69.2492	142.06
novel_144	X:136189536..136189646:-	CCUUCACCUGAAAGCCCUGCUGGGUGCAGUGCCCUGCCCAGGCAGGUGCUGAUCACUUAGUCUCUGGGUCAACAGUCCCUGCCUGGGUAGAGUAAGGCUCACCAAGAACAU	............((((((((.....))))(((.(((((((((((((.((((...((((((...))))))...)))).))))))))))))).))).))))............	111	57.66	-48.7	caacagucccugccuggguaga	235	ugcccaggcaggugcugauc	9	52	7	153	23	17.8403	2.00949	56.6584	60.5072
novel_151	X:94852375..94852485:+	CAAUAAUACACUUCCUUAAAGGUGUUCUGGAGAGGGAACCUGGAAAAGCUGAAGGUGUAAUAUGAAAACCUCAGCAAUUCUUGGUUCUCAUUUUUAGGACAUCAAUUUACU	....................((((((((((((((((((((.((((..(((((.(((...........))))))))..)))).))))))).)))))))))))))........	111	36.94	-39.6	ucagcaauucuugguucucauu	54	agggaaccuggaaaagcugaag	75	12	17	22	3	4.11698	4.88018	8.14696	7.89224
novel_153	12:18750318..18750427:+	GAGCUCAGGUCACUGCUGACAAGGGAGGUGGCGACAGUGGUACUUAUCCAGAGCGUAUGUGUGGUUGAGGCUACUCUGUCCCCACCUCCAGGGUCCCCUGAUGUGCCACA	.....((.((((.....(((...((((((((.(((((((((.((((.(((.(.......).))).)))))))))..)))).))))))))...)))...)))).)).....	110	58.18	-42	cuacucuguccccaccuccagg	3			1	0	1	1	0.343082	0	0.370316	2.63075
novel_204	16:48458250..48458360:+	GAAGGUGAUGAGUUUCAGGCUCCUUCAAUGUGGUACAGGGAGUAAAGGCCAGUUGUAUUCUUGCACAGGGCUAACUCCCGUGUACUGCACUGGUGGGUCAUAAUUGCUUCU	((((.(((......)))(((.((.(((.(((((((((((((((...((((...((((....))))...)))).)))))).))))))))).))).))))).......)))).	111	48.65	-40.7	cuaacucccguguacugcacu	6	ugugguacagggaguaaaggc	1	0	3	3	0	0	0.861208	1.11095	0
novel_207	2:20325917..20326028:-	UGGAUGGCAGAAGGGGCCUUAAAGGGAGAGAGGGAAGAGGGAAGGAGGGAUAACGUAGGAAAGAGAUCUCCCUCCUCCUUCCACCCUAGUCUCCCUUCCCCUCCCCUCUCCC	.....((.(((.((((.....((((((((.((((..((((((.(((((((..................)))))))))))))..))))..)))))))).....))))))))).	112	58.04	-52.8	ucccuccuccuuccacccuagu	2	agagggaagagggaaggagggaua	2	1	1	0	0	0.343082	0.287069	0	0
novel_211	JH118484.1:171867..171977:-	NNNNNNNNNNNNNNNNAUACCGGACUCUCUAAAUCUCACCUUAGACUCUGAGGUGAGAUUUAGAGAGUCCGGUAUCCUCCCUGGAAAUCCAUCUUCUCCUUACAUUUUAGA	.................(((((((((((((((((((((((((((...)))))))))))))))))))))))))))(((.....)))..........................	111	36.94	-50.9	ccggacucucuaaaucucaccu	3	gugagauuuagagaguccgguau	3	2	0	1	0	0.686164	0	0.370316	0
novel_214	3:33621621..33621732:-	UCACCUCACUUCUGACCUACAGAACUAUAAAUUAAUAAAUAUGAAAAAAUGCAUAUUUAUUAUCUCAUAGUUCCAUAGGUCAGAAGUAUGAAAUGAGUCUUAUUGGAAUAAA	(((..((((((((((((((..(((((((....(((((((((((........)))))))))))....)))))))..))))))))))))..))..))).(((....))).....	112	27.68	-37.9	agaacuauaaauuaauaaauau	5			4	0	1	0	1.37233	0	0.370316	0
novel_218	13:79206951..79207058:+	GAUAAAACGCGAGAUUUCUAGCAGUAACUGCUGCAACUUCGGAUCUCGCUCUGCAUUUGCGUCUAAGGAGGUGCGGGCUUUCGAACGCCGCAGUAGUUACGCGUCCCG	.........((.(((.....((.(((((((((((..(((((((....((.((((((((.(......).)))))))))).)))))).)..)))))))))))))))).))	108	53.7	-36.7	gugcgggcuuucgaacgc	3			1	0	2	0	0.343082	0	0.740633	0
novel_222	6:119679319..119679427:+	AGAUGUGGUGGGUAAAGAUCUAUUAUCAGCUACUGCAAGAAAGUGCUUCAGAGCAGGAAAGAGGGGAGCCUGCUCUGAAGGACUUUCUUUCAAUAGCUGAUAAUAGAUC	................((((((((((((((((.((.((((((((.((((((((((((...........)))))))))))).)))))))).)).))))))))))))))))	109	43.12	-59.2	ugcucugaaggacuuucuuu	10			2	2	5	1	0.686164	0.574139	1.85158	2.63075
novel_225	16:59466885..59466996:+	UCCUCCGUGGUGUGAUAACAUCUGCCUGUAGGAAUGCUGUAGGCUGCUCGCUCGGUCCCCACAGCAUUCCUGAAGGCAGAUGUUAUCCCACCACUUUUACAGGUAGAGAAAC	((..((((((((.((((((((((((((.((((((((((((.(((((......)))))...)))))))))))).)))))))))))))).)))))).......))..)).....	112	51.79	-59.7	ucugccuguaggaaugcuguagg	17			6	8	3	0	2.05849	2.29656	1.11095	0
novel_235	2:156907051..156907160:+	CCAUAAUCAAGGGGGAGAGCCUUCCCAGGUCAGGGUCUGCUCCAGGUGGGAUGCCUGUUCUCAGGUCUGCAUCCCACUGUGGCCUCCCUGCCUCGGGGUGGCACCUGCCG	((........))((.((.(((.(((((((.(((((...(((.(((.(((((((((((....)))....))))))))))).)))..)))))))).)))).)))..)).)).	110	64.55	-53.6	aucccacuguggccucccugc	17			6	0	4	7	2.05849	0	1.48127	18.4152
novel_241	7:84079627..84079737:+	GUGGGUUAAGGAUCCGGAAUUGCUGUGACCUGUGGUGUAGGUCACAGAUGCAGCUCAGAUUUGGCAUUGCUGCAUCUGUGGCGUAGGCCAGUGGCUACAGCUCUGAUUCGA	.((((((...))))))(((((((((((.((..((((.((.((((((((((((((..............)))))))))))))).)).))))..)).))))))...))))).. (-54.50)	111	53.15	-54.5	ugcaucuguggcguaggccagu	41			24	7	6	4	8.23397	2.00949	2.2219	10.523
novel_247	8:121328869..121328980:+	GGUUCAGAUUCUUAACCCAUUGAGCCACAGAAACUCCAGGACUUAGGGAUUAGCAGAGUGUUGGAGUUCCCUUGUGGCUCAAUAGGUUUAGGAUCGGGCAUCACUGCAUCAG	.((((.((((((.((((.((((((((((((.((((((((.((((..(......).)))).))))))))...)))))))))))).)))).))))))))))............. (-50.00)	112	48.21	-50	ugagccacagaaacuccaggacu	15			14	0	1	0	4.80315	0	0.370316	0
novel_249	13:112108523..112108634:-	UAUAUGUGCCCAGCUAGGCUUCUGGCUUUAAUCUCUGUCUUGUAUAUAUGAAAGAGAAAGAGAUUAAAGCUAGCAGCUUAGUUGGGCAUUUCUCUGUGGUAUGUAGCUUUCU	.....(((((((((((((((.(((((((((((((((.((((............)))).))))))))))))))).))))))))))))))).......................	112	39.29	-52.1	ucuggcuuuaaucucugucuu	39			20	2	10	7	6.86164	0.574139	3.70316	18.4152
novel_255	14:72207589..72207700:-	CGCGGCGCGAUCGCAGCCACGCUGGUGGAUGGGGAGGCGGAGUAGUACUGGCCGCGGCGCGGUAGCGGCAGCGGCCAGAACUGCCUCUGACUCUCCGACGGUCGUGUGUAAA	....(((((((((...((((....)))).(((((((.(((((((((.(((((((((.(((....))).).)))))))).)))).))))).))))))).))))))))).....	112	68.75	-64.5	agcggccagaacugccucugacu	6			4	0	2	0	1.37233	0	0.740633	0
novel_256	8:4005383..4005491:+	UGAAAAUGGACGGACGGCUGUUGCGGGGCACGUAGCGUGUGUGUGUUAGGUACACACGAGCGUGUCCUGCAAUCUCCUCCCGGUCCCCUAGUGUUCCAUUUUCUUCUCA	.((((((((((((..((..((((((((((((((..((((((((.......)))))))).))))))))))))))..))..)))............)))))))))......	109	55.05	-49.1	uugcggggcacguagcgugu	32			9	7	11	5	3.08774	2.00949	4.07348	13.1537
novel_267	2:12863131..12863240:+	CAGACCGAACCACCGGUGAUGGGGGGACGGGCGGAGGGGCGGAGGGGCCAGGUAGCUCUGAAAGCAAGCCUGGCUCUUCCGCUUUUCCGAACUGUGCGACCAGCUGAAUU	(((((((......))))..(((..(.((((.((((((((((((((((((((((.(((.....)))..))))))))))))))))))))))..)))).)..))).)))....	110	63.64	-61.2	uggcucuuccgcuuuuccgaac	7			4	3	0	0	1.37233	0.861208	0	0
novel_272	8:145570378..145570490:+	UGGGCAGUGACCGUUCGUCCCUGUGAGGCGGCCUGAGAGGAGGAGCAGAGCCCAGAUCUUCGUGCUGUGAAGCUGGACUCCGUCUCUUCCUUUCUCACUGUCUUUUUAUUUGA	.((((((((((((((((......))).))))...((((((((((((.(((.((((..(((((.....))))))))).))).).))))))))))))))))))))..........	113	54.87	-44.6	agcuggacuccgucucuuccuuu	14			4	4	5	1	1.37233	1.14828	1.85158	2.63075
novel_280	X:123217278..123217388:+	UCCCCCAAAUCUUCCCUGAUGUACGUCCCGCAGCACUACAGGCCCCCCACCAUUUGCACGCUUCUUUGGUAAAUGGUGUCGUGCCUGUGUGCGUUGCGGUGACUGUGGUUG	........(((......))).(((((((((((((.((((((((.(..((((((((((.((......))))))))))))..).))))))).).))))))).))).)))....	111	56.76	-43.7	aaauggugucgugccugugug	2			0	0	2	0	0	0	0.740633	0
novel_289	11:14607114..14607223:+	CAGCUGCCCUCCUGUUUGGGGUCUGCAGGUCCCGUGUGCCGUGCUCCAGCGUGGUGUGGGCCACUCAGCUCUGCUGGAGGACGCCCGGUGUCUGCGGGCCACCCCCAGGA	.........(((((...((((((((((((.((((.(.((.((.((((((((.(((.((((...))))))).)))))))).)))))))).))))))))))).))..)))))	110	70	-54.9	cugcuggaggacgcccggugu	8			2	4	2	0	0.686164	1.14828	0.740633	0
novel_294	2:50496460..50496572:-	GUGGAUUAAGGACCCAGGGUGGCCAUGAGCUGCAGUGUAGGUCAUAGACUCAGCUUGGAUCUGGUGUUGCUGUGUCUGUGACAUCUGCUGGCAGCUAUAGCUCCCAUUCGACC	.(((.........)))(((.(((.((.((((((...(((((((((((((.((((..............)))).)))))))))..))))..)))))))).))))))........	113	53.98	-42.3	ugugucugugacaucugcuggca	12			2	4	5	1	0.686164	1.14828	1.85158	2.63075
novel_304	7:98873380..98873491:-	CAGCACCACGAACGCCCCCAGCUCCAGGGAGAGGGGAGCAGGCCCUGGAGGUCACCUGGUCACCUAACUCUUCCUGUCUCCUCCUUCCCAGUGAGCUGGACUAUUACGACUC	.................((((((((.(((((.((((((((((......((((.((...)).)))).......)))).)))))).))))).).))))))).............	112	61.61	-41.1	cuuccugucuccuccuucccagu	8			2	3	3	0	0.686164	0.861208	1.11095	0
novel_317	X:94853303..94853413:+	AAUAAAAUCAGUACUUUGCAAUCAAACUGAAUCCCUUUUUAUUUUAUAGUUUUGCUAGUAAUAAAAGCAAAAAGACUAUAAAAUAAAAAGGAAUUCAGUUUGAUUUGUCAA	.................(((((((((((((((.(((((((((((((((((((((((.........)))))...)))))))))))))))))).))))))))))).))))...	111	23.42	-40.8	aaagacuauaaaauaaaaagga	30			5	7	9	9	1.71541	2.00949	3.33285	23.6767
novel_325	13:190079473..190079584:-	UUAUUGCAUGUGUGACAGGUAUUCUGUUAGAAAAAUGCAAGAAUGCUAUAAAAUCUUGUGUUUUUCUAACGGGAAUACUAGUCACAUGUUUUUCAAAUCCAGAGAACUUCCU	.......(((((((((.(((((((((((((((((((((((((...........))))))))))))))))).)))))))).)))))))))(((((.......)))))......	112	33.04	-39.3	auucuguuagaaaaaugcaaga	13			4	1	8	0	1.37233	0.287069	2.96253	0
novel_326	14:3836008..3836118:+	CCCCGUUCGAAUUAUUUAGGCCUCUGUCUCCGCCCCGAAUCUGCUUAGGGAACGUCUCACACAGUGCUCAUUCCUAAAGCAGACUGGGGACUGGGACUGUGGCUGGCCAGG	..................((((.(.(((((.((((((..(((((((.(((((.(...(((...)))..).))))).))))))).))))).).))))).).)))).......	111	56.76	-38.9	uuccuaaagcagacuggggacu	8			2	6	0	0	0.686164	1.72242	0	0
novel_339	6:4257659..4257769:-	AUACACUCCCAGGAAUUUUGAGGUUAUGGCAAACUGGGUUUCAGCACCUAGCAAAAUAGAGGGCUGAUUUUGCAGUGUGCUGAAACCUCGGCAUUCUCUGAAGACAUUUCC	.........(((((((.((((((((.(((((.((((.(..(((((.(((..........))))))))...).)))).))))).)))))))).)))).)))...........	111	45.05	-36.8	uuugcagugugcugaaaccucgg	8			1	1	6	0	0.343082	0.287069	2.2219	0
novel_347	1:107290834..107290943:+	CUCACCAAGGUCCCUGCCCUGAUGGAAGUCACACAGGUGGGUCAGUGGACCCAGGACUUGCAACAGGUGAUACCACAGGGCAGAACCACGUCCUCCCUUUCCACACCAGU	........(((..((((((((.(((..(((((.((((((((((....)))))...)))))......))))).))))))))))).))).......................	110	58.18	-36.1	uaccacagggcagaaccacgu	4			3	0	1	0	1.02925	0	0.370316	0
novel_348	8:82598474..82598585:-	CGCGCGAGUGAUACUUCCGCCCUUUUGGCUCUCUGUGCAGCACCAUGGCGGUUGGCAAGAAUAAGCGCCUUACGAAAGGCGGCAAAAAGGGAGCCAAGAAGAAAGUGUAAGU	(((....)))..((((.(((.(((((((((((((.(((.((.....((((.(((.......))).)))).........)).)))...)))))))).)))))...))).))))	112	53.57	-35.9	ccuuuuggcucucugugcagca	11			2	3	6	0	0.686164	0.861208	2.2219	0
novel_354	X:136187777..136187887:-	ACGAUGUGAACACCUGUAGGUUAGAGGAGAUGAAGACGCUUCUCAGUAGAAGAGGAGAAGAGUCUAACUCUCCUGUCCUCCAGUGUUCCUCUUCAGCAUUCUAGAAAACCG	..(((((((((((.((.(((....((((((...((((.((((((..........)))))).))))...))))))..))).)))))))).......)))))...........	111	46.85	-34.7	uuagaggagaugaagacgcuu	184	aagagucuaacucuccugucc	15	24	2	103	55	8.23397	0.574139	38.1426	144.691
novel_362	6:72237921..72238030:-	CACGCUAAAAAAGGGAGGGAGGACGGGAAGAGAGGAGGGAGCAAGGCCUUCUUUGACUCCUUCCUUUCACCGAAGUCUAACGGACAGCGAGCACGCAAAUCUUAAGUACA	..((((......(..(((.....(((...(((((((((((((((((....))))).)))))))))))).)))...)))..)....)))).....................	110	51.82	-33.4	aggacgggaagagaggagggag	15			7	8	0	0	2.40157	2.29656	0	0
novel_366	1:182942454..182942564:+	CUUCAGGACUUUCGCUCUUCUUGCCAUUGGGUCUGGGGUGUUUCCAGGGGAAGAAAACACACCCCAGACCCAACGGCAGGAGCAGCAAAAGCAGUGGCAGUCACGGCUGUG	........((((.(((.((((((((.(((((((((((((((((((...))))......))))))))))))))).)))))))).))).))))((((.(......).))))..	111	56.76	-57	uugccauugggucuggggugu	2			0	1	0	1	0	0.287069	0	2.63075
novel_367	X:48069347..48069457:-	UCUCCCUCCUCUCCCGGGGGUGCGAAUGGAGUGGGGGGCAAGGCCAGGGGUGGGCCCUUCUGAUGGCCACUGAUGGCCUCUGUCCCCCAGAUCAUCUUCUCUCCUGAGUGC	((.((((((......))))).).))((((..(((((((((((((((..(((((.((........)))))))..)))))).)))))))))..))))...(((....)))...	111	64.86	-53.1	cugauggccucugucccccaga	1			1	0	0	0	0.343082	0	0	0
novel_375	4:108807532..108807644:+	CCCUGUAUGGCUUCGGGGGCUAAGCUGCUAGUUCUGCUACGUGAGACAAUCUCAAAGGCCCUUUUUAGGGCCAACCACACAGUCCUCAGAAGAGCUGAGCGCUUGCCUAAAAA	(((((........)))))((.((((.(((((((((......((((((.........((((((....)))))).........)).))))..)))))).))))))))).......	113	52.21	-39.7	uaagcugcuaguucugcuacgug	5			2	2	1	0	0.686164	0.574139	0.370316	0
novel_380	GL892983.1:13295..13406:-	GUCACGCCCGCUUCCCCGGUCUCUCCAGCCUCUGCUUCGUGGGGACUGAGCAUCAGGAGCGGUGGCUGGGGGGAAACGGGGGGCNNNNNNNNNNNNNNNNNNNNNNNNNNNN	.........(((.(((((.(((((((((((.(((((((.(((.(......).)))))))))).)))))))))))..))))))))............................	112	52.68	-46.4	ucucuccagccucugcuucgugg	1			0	0	1	0	0	0	0.370316	0
novel_382	6:90797466..90797576:+	GAAACAGCAGGAUUAAGUACCUACAGGACCAGGGACAGGCCGCUGCACCUCUUGCUCAGUUCAGGGAAGGAGUUACAGCCGCCUGUCUCUGGUCCUGGGGGUGACCUGGGU	.......((((......(((((.(((((((((((((((((.((((...(((((.(((......))).)))))...)))).))))))))))))))))).))))).))))...	111	58.56	-60.2	guuacagccgccugucucuggu	5			0	2	3	0	0	0.574139	1.11095	0
novel_384	15:117092930..117093037:-	AUUCAGCCUUUACAGUUGCCUUUGGGAAAGCAUUCAGAUCUUCCUGAGAACUGAGUUGAGAUGCAAGUCUCUCUGCGGAGACUGAAUUAACCAGGCUGUGUAGGAAUA	......(((.((((((.....((((......((((((.((((((.((((...((.(((.....))).)))))).).)))))))))))...)))))))))).)))....	108	44.44	-30.5	cucugcggagacugaauu	3			2	0	1	0	0.686164	0	0.370316	0
novel_387	4:131392267..131392374:-	AACAGCCCUGGUUGGGGUGAGGGGUCGGGGGAUCAGAGAAGAAAGGUACAGCUCACCAGCACCUGGGCAGCUGCCCAGUGCUCUGAACCAUCUGUCUCCUUUGAAGCA	..((.(((.....))).))(((((.((((((.((((((......((..(((((..((((...))))..))))).))....)))))).)).)))).)))))........	108	58.33	-43.8	gcugcccagugcucugaac	3			1	1	1	0	0.343082	0.287069	0.370316	0
novel_389	5:110138501..110138608:+	AAGAGUGGAUGCUGCCAUUCAGAUUGUGAAUCUAGACAUGGGAACCCUCCAAAGUCUAGGUACAGAUCUGAUGAUAUCCUGAAAGGCAGGGAUUUGCCUGAUGGCACC	....((((......))))(((((((.((.((((((((...(((....)))...)))))))).))))))))).....(((((.....)))))...((((....))))..	108	47.22	-35.2	agauugugaaucuagaca	3			2	0	1	0	0.686164	0	0.370316	0
novel_396	GL895499.1:15177..15287:-	UGGGGUGCCUUGGGGAAGGGGGUGGGGAGAAGGGCACACGCCUCAGGCCGGGGUCUGACUCUGUGCACCUUUCCCCUCGCCCAUCCCCAGAGCACGCACGGUGUUCCCCGG	..(.((((.(((((((.(((.(.(((((((.(((((((.(..((((((....))))))..)))))).))))))))).).))).))))))).)))).).(((......))).	111	69.37	-63.4	uuuccccucgcccauccccaga	1			0	0	1	0	0	0	0.370316	0
novel_410	JH118527.1:56965..57076:+	UCCUGGCUGCCCAGAGGGAUGCUCAGAGCGGCGGGGACUGAGCAUGGAGCGGAGGCCUUCAUCUGUCGCCUCACGUCCAUGGUCAGCACCGUGGCUGCUGGGCCUGUGGCUC	........((((((......(((((((((.((((.(.((((.((((((.(((((((...........))))).)))))))).))))).)))).))).))))))))).)))..	112	66.69	-55.7	ucacguccauggucagcaccgu	5			1	3	0	1	0.343082	0.861208	0	2.63075
novel_415	2:147020935..147021046:-	CCAUGUACCUUGUAGGGCUGUUGAGACAAUUGAGAGAUGAUUGCUAAAUUCAUUAUUUACAUCUCUUAAUUGUCUCAACAGCCCUACAAGAAUGAAUGUAGCAGUUCUGGCA	........(((((((((((((((((((((((((((((((.....(((((.....))))))))))))))))))))))))))))))))))))...((((......)))).....	112	38.39	-55.5	uugagacaauugagagaugau	4			1	1	2	0	0.343082	0.287069	0.740633	0
novel_418	GL894032.2:2955..3066:-	AGAGGCUCUUAGCGGCUCUAGCCUAUCUGGGGGUGGAGGAGGUGGGAACUGGGCUCUGACCCUGAUCAGUUCCCCCCAUCCUUGCCCCCAGAUCUACCCAGACCCAGAGCUA	...((((((....((.(((.(...(((((((((((.((((((.(((((((((..((.......))))))))))).)).)))))))))))))))....).))).)))))))).	112	60.71	-51.7	uuccccccauccuugcccccaga	1			1	0	0	0	0.343082	0	0	0
novel_419	JH118928.1:123800..123910:-	AAGUGUUGAGGGAGAGGAAAGAAGAGUUAGUGGGUCAGAGAGGAAGGAUGUGAUUUGAGCAGAUGGUUCUCAUUCUCCUUCUUUGACCAGAGUACCUGAAUUAUGAGGAUG	................................(((((((((((.((((((.((..............)).)))))).)))))))))))......(((........)))...	111	44.14	-27.3	ucauucuccuucuuugaccaga	1			0	1	0	0	0	0.287069	0	0
novel_420	8:137797613..137797724:-	ACUUGUGGGUUUCACAUCUGUGGAUUCACUCAACUUGGGUUUGCAAACAAUACAUGAACCAGGGUUGACUGAAUCCUGGGAUGUGGAACCCGUGGAUUUGGAGGGUUUACUG	......(((((((((((((..(((((((.(((((((.(((((.............))))).))))))).)))))))..)))))))))))))((((((((...))))))))..	112	46.43	-46.9	guggauucacucaacuuggguuu	4			1	1	2	0	0.343082	0.287069	0.740633	0
novel_426	GL894077.1:126835..126947:+	UGUGGAAGAGCCCCGCCACCCCCUUGCUGGGGGAAGGGGAGUGAGUAAGCCCCACGCCCACCCCUCCCGCCAGCGAUGGAGCGGAGGGAGCUCUGGGGCGGCUGGACACCUGG	......((((((((.((.(.((.(((((((((((.((((.(((...........)))...)))))))).))))))).)).).)).))).))))).(((.(......).)))..	113	71.68	-51.6	caccccucccgccagcgaugga	1			1	0	0	0	0.343082	0	0	0
novel_45	X:136188494..136188605:-	CGUGCUGUGUGUGGUGCCCUAUCCAGGCAGGUGCUGUUCUCUUUACUAGUGAACGGCGCCUGUGUGGUUAGAGUAAGGCUCACAAGAACAUCGACUCUGGUGGCCUCGGGAC	.((.(((.......(((.(((.(((.(((((((((((((.((.....)).))))))))))))).))).))).)))((((.(((.(((........))).)))))))))).))	112	56.25	-49.6	uauccaggcaggugcuguucucu	9306	ugaacggcgccugugugguuaga	2205	2659	257	5336	1054	912.255	73.7769	1976.01	2772.81
novel_46	X:136186251..136186361:-	UGUGCUGUGUGCGGUGCCCUAUCCAGACAGGUGCUGUUCUCUUGACGACUGCUGAACGGCGCCUGUGUGGUUAGAGCAAGGCUCACAAGAACAUCGACUGGACCAGCGCGG	(((((((.((.((((((.(((.(((.(((((((((((((..............))))))))))))).))).))).)))..(.((....)).).....))).))))))))).	111	58.56	-49	uauccagacaggugcuguucuc	8721	ugaacggcgccugugugguuaga	2205	2027	167	4861	1666	695.427	47.9406	1800.11	4382.83
novel_53	X:136185247..136185359:-	GGUCCUCCACCUCGAAGCCGUGCUGUGUGUGGUGCCCUGACCAGGCAGGUGCUGUUCUCUCGACGAGUAGUGAACGGUGCCUGUGUGGCUAGAGUAAGGCUCACAAGAACAUC	(((..((......)).)))((.(((((.((..(((.(((.(((.(((((((((((((.(((.....).)).))))))))))))).))).))).)))..)).))).)).))...	113	58.41	-41	ugaacggugccuguguggcuaga	5403	ugaccaggcaggugcuguucucu	647	2162	146	2428	667	741.743	41.9121	899.128	1754.71
novel_76	6:58064276..58064387:+	GGCGGCCCCGGACCCAGUUGGGGGCAGUCUCCGCCAUCUUACUGGGCAGCAUUGGAUGGUGUCUGGUCUCUAAUACUGCCUGGUAAUGAUGACGGCGGGGCCCUGCUCGCAG	(((.(((((.(((...))).))))).))).(((.(((((((((((((((.((((((.((.......)))))))).))))))))))).)))).)))((((......))))...	112	63.39	-51.1	uaauacugccugguaaugaugac	819			206	435	136	42	70.6749	124.875	50.363	110.491
