# Supplementary figures and images for: Integrated analysis of miRNA and mRNA expression profiles in development of porcine testes
Source: Royal Society of Chemistry journal article supplement (doi:10.1039/c5ra07488f), 2015-01-01

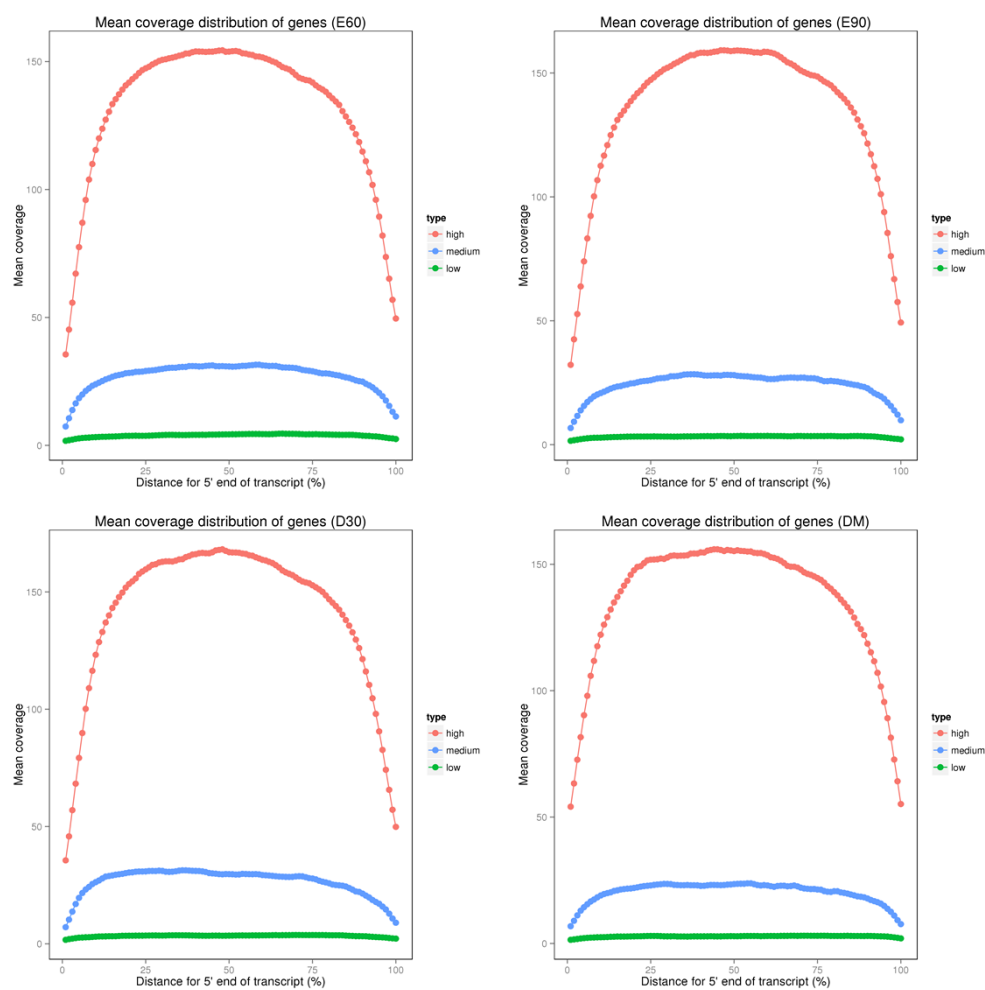

Figure S1 Transcript homogeneity of mRNA read libraries generated from four samples.

Supplement: c5ra07488f1.pdf [file c5ra07488f1.pdf]
